# Supplementary material for: First iron and cobalt(ii) hexabromoclathrochelates: structural, magnetic, redox, and electrocatalytic behavior
Source: Royal Society of Chemistry journal article supplement (doi:10.1039/c4dt03082f), 2015-01-01
Supplement: c4dt03082f1.pdf [file c4dt03082f1.pdf]

## Electronic Supplementary Information

For

### **First iron and cobalt(II) hexabromoclathrochelates: structural, magnetic, redox and electrocatalytic behavior.**

Alexander V. Dolganov<sup>a</sup>, Alexander S. Belov<sup>a</sup>, Valentin V. Novikov<sup>a</sup>, Anna V. Vologzhanina<sup>a</sup>, Galina V. Romanenko<sup>b</sup>, Yulia G. Budnikova<sup>c</sup>, Genrikh E. Zelinskii<sup>a</sup>, Michail I. Buzin<sup>a</sup>, Yan Z. Voloshin<sup>a</sup>

<sup>a</sup> *Nesmeyanov Institute of Organoelement Compounds of the Russian Academy of Sciences, 119991 Moscow, Russia. E-mail: voloshin@ineos.ac.ru; Fax: +7 (499)135-5085*

<sup>b</sup> *International Tomography Center, the Siberian Branch of the Russian Academy of Sciences, 630090 Novosibirsk, Russia*

<sup>c</sup> *A.E. Arbusov Institute of Organic and Physical Chemistry, Kazan Scientific Center, Russian Academy of Sciences, Kazan, Russian Federation.*

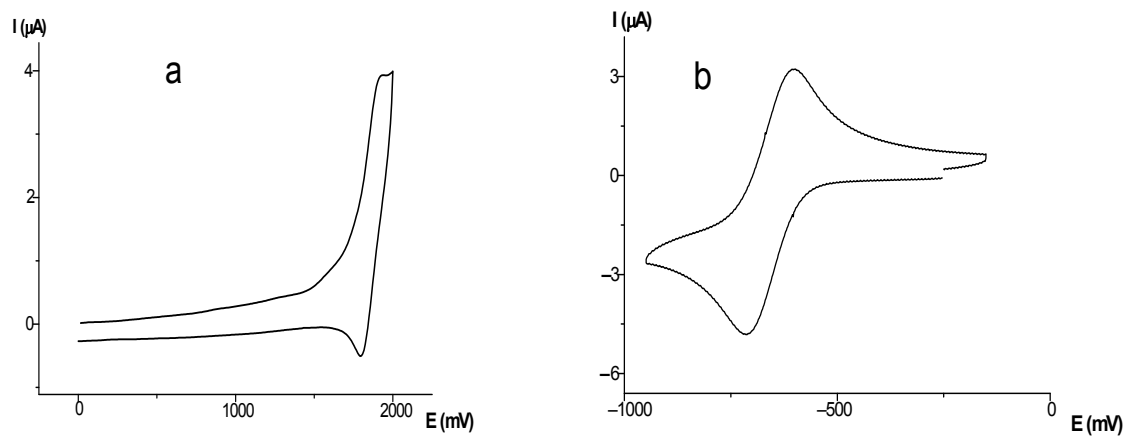

Figure S1. CV for the acetonitrile solution of the clathrochelate  $\text{Fe}(\text{Br}_2\text{Gm})_3(\text{Bn}-\text{C}_4\text{H}_9)_2$  in the anodic (a) and cathodic (b) ranges.

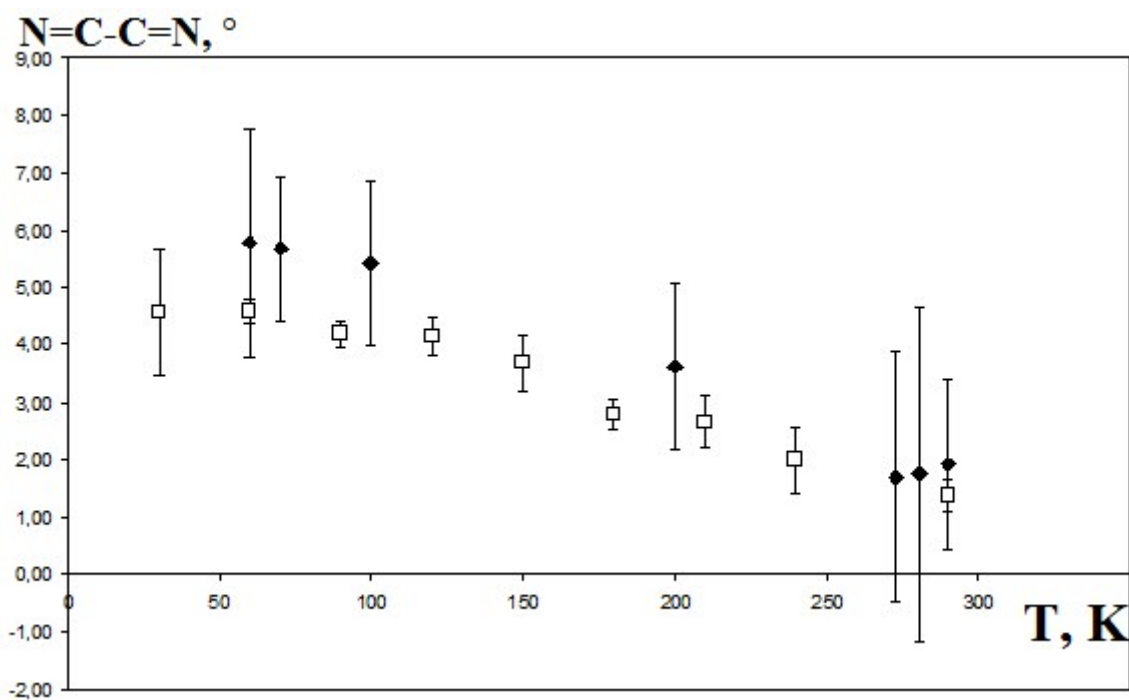

Figure S2. Temperature variation of the average  $\text{N} = \text{C} - \text{C} = \text{N}$  angles for the cobalt(II) hexahalogenoclatrochelates  $\text{Co}(\text{Br}_2\text{Gm})_3(\text{Bn}-\text{C}_4\text{H}_9)_2$  (black diamonds) and  $\text{Co}(\text{Cl}_2\text{Gm})_3(\text{Bn}-\text{C}_4\text{H}_9)_2$  (white squares).

**Table S1.** Maxima of the UV-vis spectra ( $\lambda_{\text{max}}/\text{nm}$ ,  $\varepsilon \cdot 10^{-3} \text{ mol}^{-1} \cdot \text{L} \cdot \text{cm}^3$ ) of the iron and cobalt(II) hexahalogenoclatrochelates.

| Complex                                                                             | $\nu_1$ ( $\varepsilon_1$ ) | $\nu_2$ ( $\varepsilon_2$ ) | $\nu_3$ ( $\varepsilon_3$ ) | $\nu_4$ ( $\varepsilon_4$ ) | $\nu_5$ ( $\varepsilon_5$ ) | $\nu_6$ ( $\varepsilon_6$ ) | $\nu_7$ ( $\varepsilon_7$ ) | $\nu_8$ ( $\varepsilon_8$ ) |
|-------------------------------------------------------------------------------------|-----------------------------|-----------------------------|-----------------------------|-----------------------------|-----------------------------|-----------------------------|-----------------------------|-----------------------------|
| $\text{Fe}(\text{Cl}_2\text{Gm})_3(\text{Bn}-\text{C}_4\text{H}_9)_2$ <sup>3a</sup> | 259(7.9)                    | 285(5.4)                    | 313(2.7)                    |                             |                             | 423(4.8)                    | 453 (15)                    |                             |
| $\text{Fe}(\text{Br}_2\text{Gm})_3(\text{Bn}-\text{C}_4\text{H}_9)_2$               | 262 (11)                    | 264 (1.8)                   | 290 (1.0)                   | 350 (1.7)                   |                             | 428 (2.2)                   | 448 (9.2)                   | 459 (7.7)                   |
| $\text{Fe}(\text{I}_2\text{Gm})_3(\text{Bn}-\text{C}_4\text{H}_9)_2$ <sup>4</sup>   | 264 (6.3)                   | 287 (7.0)                   |                             |                             | 397 (3.6)                   | 430 (5.7)                   | 464 (19)                    | 496 (5.4)                   |
| $\text{Co}(\text{Cl}_2\text{Gm})_3(\text{Bn}-\text{C}_4\text{H}_9)_2$ <sup>3d</sup> |                             | 267 (20)                    | 287 (8.4)                   | 329 (3.1)                   | 368 (3.2)                   | 421 (0.64)                  |                             | 468 (1.6)                   |
| $\text{Co}(\text{Br}_2\text{Gm})_3(\text{Bn}-\text{C}_4\text{H}_9)_2$               | 249 (7.3)                   | 272 (21)                    | 302 (5.3)                   | 335 (3.7)                   | 371 (4.0)                   | 444 (2.0)                   |                             | 477 (2.2)                   |

**Table S2.** The number of inter- and intramolecular interactions of the hexahalogenoclathrochelates  $\text{Co}(\text{Br}_2\text{Gm})_3(\text{Bn}-\text{C}_4\text{H}_9)_2$  and  $\text{Co}(\text{Cl}_2\text{Gm})_3(\text{Bn}-\text{C}_4\text{H}_9)_2$  at different temperatures

| Type of A...Z<br>interaction <sup>a</sup> | $\text{Co}(\text{Br}_2\text{Gm})_3(\text{Bn}-\text{C}_4\text{H}_9)_2$ |     |     |     |     |    |    | $\text{Co}(\text{Cl}_2\text{Gm})_3(\text{Bn}-\text{C}_4\text{H}_9)_2$ |     |         |    |    |    |
|-------------------------------------------|-----------------------------------------------------------------------|-----|-----|-----|-----|----|----|-----------------------------------------------------------------------|-----|---------|----|----|----|
|                                           | 290                                                                   | 281 | 273 | 200 | 100 | 70 | 60 | 290                                                                   | 240 | 210-120 | 90 | 60 | 30 |
| Intramolecular interactions               |                                                                       |     |     |     |     |    |    |                                                                       |     |         |    |    |    |
| Co...N                                    | 6                                                                     | 6   | 6   | 6   | 6   | 6  | 6  | 6                                                                     | 6   | 6       | 6  | 6  | 6  |
| B...Co                                    | 4                                                                     | 4   | 4   | 4   | 4   | 4  | 4  | 4                                                                     | 4   | 4       | 4  | 4  | 4  |
| O...C                                     | 24                                                                    | 24  | 24  | 24  | 24  | 24 | 24 | 24                                                                    | 24  | 24      | 24 | 24 | 24 |
| O...B                                     | 6                                                                     | 6   | 6   | 6   | 6   | 6  | 6  | 6                                                                     | 6   | 6       | 6  | 6  | 6  |
| O...O                                     | 12                                                                    | 12  | 12  | 12  | 12  | 12 | 12 | 12                                                                    | 12  | 12      | 12 | 12 | 12 |
| O...N                                     | 22                                                                    | 22  | 22  | 22  | 22  | 22 | 22 | 22                                                                    | 22  | 22      | 22 | 22 | 21 |
| N...N                                     | 20                                                                    | 20  | 20  | 20  | 20  | 20 | 20 | 20                                                                    | 20  | 20      | 20 | 20 | 20 |
| N...B                                     | 12                                                                    | 12  | 12  | 12  | 12  | 12 | 12 | 12                                                                    | 12  | 12      | 12 | 12 | 12 |
| N...C                                     | 18                                                                    | 14  | 18  | 18  | 18  | 18 | 18 | 18                                                                    | 18  | 18      | 18 | 18 | 18 |
| C...B                                     | 6                                                                     | 6   | 6   | 6   | 6   | 6  | 6  | 6                                                                     | 6   | 6       | 6  | 6  | 6  |
| B...H                                     | 16                                                                    | 16  | 16  | 16  | 16  | 16 | 16 | 16                                                                    | 16  | 16      | 16 | 16 | 16 |
| Hal...C                                   | 14                                                                    | 18  | 14  | 14  | 18  | 18 | 18 | 14                                                                    | 14  | 18      | 18 | 18 | 18 |
| Hal...Hal                                 | 6                                                                     | 6   | 6   | 6   | 6   | 6  | 6  | 6                                                                     | 6   | 6       | 6  | 6  | 6  |
| Hal...H                                   | 8                                                                     | 8   | 8   | 8   | 8   | 8  | 8  | 8                                                                     | 8   | 8       | 8  | 8  | 8  |
| Hal...O                                   | 12                                                                    | 12  | 12  | 12  | 12  | 12 | 12 | 12                                                                    | 12  | 12      | 12 | 12 | 12 |
| O...H                                     | 28                                                                    | 28  | 28  | 30  | 28  | 28 | 28 | 28                                                                    | 28  | 28      | 28 | 28 | 28 |
| C...C                                     | 17                                                                    | 17  | 17  | 17  | 13  | 17 | 17 | 17                                                                    | 17  | 17      | 17 | 17 | 17 |
| C...H                                     | 86                                                                    | 86  | 86  | 86  | 90  | 86 | 86 | 90                                                                    | 90  | 90      | 90 | 90 | 90 |
| H...H                                     | 88                                                                    | 88  | 88  | 84  | 88  | 88 | 92 | 88                                                                    | 88  | 88      | 88 | 88 | 86 |
| Intermolecular interactions               |                                                                       |     |     |     |     |    |    |                                                                       |     |         |    |    |    |
| Hal...H                                   | 92                                                                    | 88  | 80  | 87  | 76  | 80 | 84 | 80                                                                    | 80  | 80      | 80 | 80 | 78 |
| Hal...O                                   | 20                                                                    | 20  | 20  | 20  | 20  | 20 | 20 | 20                                                                    | 20  | 20      | 20 | 20 | 22 |
| Hal...Hal                                 | 22                                                                    | 22  | 22  | 22  | 22  | 22 | 22 | 22                                                                    | 22  | 22      | 18 | 18 | 20 |
| Hal...N                                   | 20                                                                    | 20  | 20  | 20  | 20  | 20 | 20 | 12                                                                    | 12  | 12      | 12 | 12 | 14 |
| Hal...C                                   | 16                                                                    | 16  | 16  | 16  | 16  | 16 | 16 | 16                                                                    | 16  | 16      | 16 | 16 | 20 |
| H...H                                     | 46                                                                    | 46  | 46  | 46  | 42  | 46 | 46 | 42                                                                    | 42  | 42      | 42 | 42 | 44 |
| H...O                                     | 40                                                                    | 40  | 48  | 42  | 56  | 52 | 48 | 52                                                                    | 52  | 52      | 52 | 52 | 52 |
| C...H                                     | 56                                                                    | 56  | 52  | 52  | 56  | 56 | 56 | 52                                                                    | 52  | 52      | 52 | 52 | 52 |
| N...H                                     | 32                                                                    | 32  | 32  | 32  | 32  | 32 | 32 | 32                                                                    | 32  | 32      | 32 | 32 | 32 |
| Co...H                                    | 4                                                                     | 4   | 4   | 4   | 4   | 4  | 4  | 4                                                                     | 4   | 4       | 4  | 4  | 4  |
| C...C                                     | 0                                                                     | 0   | 0   | 8   | 8   | 4  | 4  | 0                                                                     | 4   | 4       | 4  | 4  | 6  |

<sup>a</sup> The interacting pairs are denoted as A...Z. The full details of such procedure a comparison of the conformation polymorphs are described in ref. 19.
